# Supplementary material for: Oncoprotein ZNF322A transcriptionally deregulates alpha-adducin, cyclin D1 and p53 to promote tumor growth and metastasis in lung cancer
Source: PubMed Central journal article supplement — Oncogene. 2015 Aug 17;35(18):2357–69. doi: 10.1038/onc.2015.296 (PMC4865475; doi:10.1038/onc.2015.296), 2015-08-17
Supplement: onc2015296x3.pdf [file onc2015296x3.pdf]

## SUPPLEMENTARY TABLES

**Table S1. Alteration of ZNF322A protein expression levels in relation to clinicopathological parameters in 123 Asian and 74 Caucasian lung cancer patients.**

| Characteristics               | Asian patients                        |                                          | <i>P</i> -value <sup>a</sup> | Caucasian patients                    |                                          | <i>P</i> -value <sup>a</sup> |
|-------------------------------|---------------------------------------|------------------------------------------|------------------------------|---------------------------------------|------------------------------------------|------------------------------|
|                               | Overexpression<br>97 (78.9%)<br>N (%) | Normal expression<br>26 (21.1%)<br>N (%) |                              | Overexpression<br>54 (72.9%)<br>N (%) | Normal expression<br>20 (27.1%)<br>N (%) |                              |
| <b>Age</b>                    |                                       |                                          |                              |                                       |                                          |                              |
| <60                           | 48 (75.0)                             | 16 (25.0)                                | 0.377                        | 28 (70.0)                             | 12 (30.0)                                | 0.792                        |
| ≥60                           | 49 (83.1)                             | 10 (16.9)                                |                              | 24 (75.0)                             | 8 (25.0)                                 |                              |
| <b>Sex</b>                    |                                       |                                          |                              |                                       |                                          |                              |
| Male                          | 56 (82.4)                             | 12 (17.6)                                | 0.375                        | 32 (78.0)                             | 9 (22.0)                                 | 0.303                        |
| Female                        | 41 (74.5)                             | 14 (25.5)                                |                              | 22 (66.7)                             | 11 (33.3)                                |                              |
| <b>Smoke</b>                  |                                       |                                          |                              |                                       |                                          |                              |
| Yes                           | 39 (75.0)                             | 13 (25.0)                                | 0.479                        | 28 (82.4)                             | 6 (17.6)                                 | 0.477                        |
| No                            | 39 (81.2)                             | 9 (18.8)                                 |                              | 2 (66.7.0)                            | 1 (33.3)                                 |                              |
| <b>Tumor type<sup>b</sup></b> |                                       |                                          |                              |                                       |                                          |                              |
| ADC                           | 68 (78.2)                             | 19 (21.8)                                | 0.609                        | 17 (81.0)                             | 4 (19.0)                                 | 1.000 <sup>c</sup>           |
| SCC                           | 26 (83.9)                             | 5 (16.1)                                 |                              | 22 (84.6)                             | 4 (15.4)                                 |                              |
| Large cell                    | -                                     | -                                        |                              | 12 (50.0)                             | 12 (50.0)                                |                              |
| <b>Tumor stage</b>            |                                       |                                          |                              |                                       |                                          |                              |
| I & II                        | 56 (74.7)                             | 19 (25.3)                                | 0.256                        | 29 (67.4)                             | 14 (32.6)                                | 0.298                        |
| III & IV                      | 38 (84.4)                             | 7 (15.6)                                 |                              | 23 (79.3)                             | 6 (20.7)                                 |                              |

<sup>a</sup> The data were analyzed by Pearson  $\chi^2$  test.

<sup>b</sup> ADC, adenocarcinoma; SCC, squamous cell carcinoma.

<sup>c</sup> *P* value was analyzed for ADC vs. SCC.

**Table S2. The 1,108 proteins, identified with high confidence in two independent experiments (experiment 1 and 2), by iTRAQ quantitative proteomic analysis on total cell lysate taken from control and si-ZNF322A expressing A549 cells.** Provided as a separate Excel file.

Our ZNF322A proteomic data has been submitted to ProteomeXchange Consortium with accession number PXD001123 (Reviewer link via <http://tinyurl.com/oh2gxg7>). Login information is listed as follows: Username: [reviewer21585@ebi.ac.uk](mailto:reviewer21585@ebi.ac.uk); Password: i7JiUVJA).

**Table S3. The primers used in the current study.**

| Gene                 | Primer  | Sequences (5' → 3')                         | Application <sup>a</sup> | PCR size (bp)   | T <sub>m</sub> (°C) |
|----------------------|---------|---------------------------------------------|--------------------------|-----------------|---------------------|
| <i>GAPDH</i> mRNA    | Forward | GAG TCA ACG GAT TTG GTC GT                  | qRT-PCR                  | 238             | 60                  |
|                      | Reverse | TTG ATT TTG GAG GGA TCT CG                  |                          |                 |                     |
| <i>ZNF322A</i> mRNA  | Forward | GTG GTC TGC GTG TGA GAG TGG C               | qRT-PCR                  | 226             | 60                  |
|                      | Reverse | TTC TGA CGC ATG GGG AGG GCT                 |                          |                 |                     |
| <i>ADD1</i> mRNA     | Forward | TCC CAG GTT TTG TGT GGT GTA GT              | qRT-PCR                  | 150             | 60                  |
|                      | Reverse | ACG GTC TGT GAG TGT GGT GAA G               |                          |                 |                     |
| <i>CCND1</i> mRNA    | Forward | AAC TAC CTG GAC CGC TTC CT                  | qRT-PCR                  | 204             | 60                  |
|                      | Reverse | CCA CTT GAG CTT GTT CAC CA                  |                          |                 |                     |
| <i>p53</i> mRNA      | Forward | GTG GAA GGA AAT TTG CGT GT                  | qRT-PCR                  | 184             | 60                  |
|                      | Reverse | CCA GTG TGA TGA TGG TGA GG                  |                          |                 |                     |
| <i>ADD1 AP1-2</i>    | Forward | GCT GCA GTG AGC CAT GGT T                   | ChIP-qPCR                | 180             | 60                  |
|                      | Reverse | TAT ATA CCC CAA AGA AAT GAA AAC AGC TA      |                          |                 |                     |
| <i>CCND1 AP1-1</i>   | Forward | GCC CAT TCT GCC GGC TTG GA                  | ChIP-qPCR                | 132             | 60                  |
|                      | Reverse | GGG GTG AGG TGG AGG TGG CT                  |                          |                 |                     |
| <i>CCND1 AP1-2</i>   | Forward | TGA AGG GAC GTC TAC ACC CC                  | ChIP-qPCR                | 250             | 60                  |
|                      | Reverse | CTG CCT TCC TAC CTT GAC CA                  |                          |                 |                     |
| <i>p53 AP-1</i>      | Forward | GCA CCA GGT CGG CGA GAA TCC                 | ChIP-qPCR                | 131             | 60                  |
|                      | Reverse | TGC GAG GCT CCT GGC ACA AA                  |                          |                 |                     |
| <i>ADD1</i> promoter | Forward | GCG CAC GCG TAC AGG CAA GAG CCA CCA C       | Construction             | -- <sup>b</sup> | 72                  |
|                      | Reverse | GCG CAG ATC TCT TAG GGA GGC AGA AAC AGG AGG |                          |                 |                     |

| Gene                              | Primer  | Sequences (5' → 3')                                 | Application <sup>a</sup>   | PCR size (bp)   | T <sub>m</sub> (°C) |
|-----------------------------------|---------|-----------------------------------------------------|----------------------------|-----------------|---------------------|
| <i>CCND1</i> promoter             | Forward | GCG CGG TAC CCT ACA CCC CCA ACA AAA CCA             | Construction               | -- <sup>b</sup> | 61                  |
|                                   | Reverse | GGA CCC ACA GCC CTC CCC AGA GAT CTG CGC             |                            |                 |                     |
| <i>ADD1</i><br>AP1-1 site mutant  | Forward | CAG GGT CTC CTT ATG TTG TCC GGT TAA GTC TGC C       | Site-direct<br>mutagenesis | -- <sup>b</sup> | 71                  |
|                                   | Reverse | GGC AGA CTT AAC CGG ACA ACA TAA GGA GAC CCT G       |                            |                 |                     |
| <i>ADD1</i><br>AP1-2 site mutant  | Forward | GCG ACA GAG ACC CTG GCT TCA AAA AAA AAA AAA AA      | Site-direct<br>mutagenesis | -- <sup>b</sup> | 71                  |
|                                   | Reverse | TTT TTT TTT TTT TTT GAA GCC AGG GTC TCT GTC GC      |                            |                 |                     |
| <i>ADD1</i><br>AP1-3 site mutant  | Forward | CTG TCT CTC TGA ATT TGG CTG CTC TAG ACA CCT CAT ACA | Site-direct<br>mutagenesis | -- <sup>b</sup> | 71                  |
|                                   | Reverse | TGT ATG AGG TGT CTA GAG CAG CCA AAT TCA GAG AGA CAG |                            |                 |                     |
| <i>ADD1</i><br>AP1-4 site mutant  | Forward | TTC ATA TTA TTG TTC GGT TAT CAC CAC CAT CC          | Site-direct<br>mutagenesis | -- <sup>b</sup> | 65                  |
|                                   | Reverse | GGA TGG TGG TGA TAA CCG AAC AAT AAT ATG AA          |                            |                 |                     |
| <i>CCND1</i><br>AP1-1 site mutant | Forward | GGT GTC GCC GCG CCC CGG TTA CCC CTT CTC GTG         | Site-direct<br>mutagenesis | -- <sup>b</sup> | 65                  |
|                                   | Reverse | CAC GAG AAG GGG TAA CCG GGG CGC GGC GAC ACC         |                            |                 |                     |
| <i>CCND1</i><br>AP1-2 site mutant | Forward | AAA AAA AAT GGG TTA GAA TGG AGA TCA C               | Site-direct<br>mutagenesis | -- <sup>b</sup> | 50                  |
|                                   | Reverse | GTG ATC TCC ATT CTA ACC ACT TTT TTT T               |                            |                 |                     |
| <i>p53</i><br>AP-1 site mutant    | Forward | GAG GAG GGT GCA TAG CCA GGA TTC TCG C               | Site-direct<br>mutagenesis | -- <sup>b</sup> | 61                  |
|                                   | Reverse | GCG AGA ATC CTG GCT ATG CAC CCT CCT C               |                            |                 |                     |
| <i>p53</i><br>sequencing primer   | Forward | AAG ACC TGC CCT GTG                                 | Sequencing                 | 765             | 60                  |
|                                   | Reverse | GTC TGA GTC AGG CCC TTC                             |                            |                 |                     |

<sup>a</sup> qRT-PCR, quantitative reverse-transcriptase polymer chain reaction; ChIP-qPCR, quantitative chromatin-immunoprecipitation coupled with polymer chain reaction.

<sup>b</sup> --, Not applicable.

**Table S4. Antibodies and their reaction conditions used in the current study.**

| <b>Target</b> | <b>KD</b> | <b>Raised In</b> | <b>Application</b> | <b>Dilution</b> | <b>Source</b> | <b>Catalog No.</b> |
|---------------|-----------|------------------|--------------------|-----------------|---------------|--------------------|
| ZNF322A       | 44        | Rabbit           | IHC                | 1:400           | LifeSpan      | LS-C30280          |
|               |           |                  | Western blot       | 1:1000          |               |                    |
|               |           |                  | ChIP               | 1:50            |               |                    |
|               |           |                  | IP                 | 1:50            |               |                    |
| c-Jun         | 39        | Rabbit           | ChIP               | 1:50            | Abcam         | ab-31419           |
|               |           |                  | IP                 | 1:50            |               |                    |
| CCND1         | 36        | Rabbit           | IHC                | 1:300           | Epitomics     | 2261-1             |
|               |           |                  | Western blot       | 1:1000          |               |                    |
| p53           | 53        | Mouse            | IHC                | 1:400           | Santa Cruz    | sc-126             |
|               |           |                  | Western blot       | 1:1000          |               |                    |
| ADD1          | 81        | Rabbit           | IHC                | 1:500           | GeneTex       | GTX101600          |
|               |           |                  | Western blot       | 1:1000          |               |                    |
| VPS25         | 21        | Rabbit           | Western blot       | 1:1000          | GeneTex       | GTX108088          |
| PGM2          | 68        | Rabbit           | Western blot       | 1:300           | GeneTex       | GTX119168          |
| KIAA0090      | 112       | Rabbit           | Western blot       | 1:1000          | GeneTex       | GTX119884          |
| MCM2          | 102       | Rabbit           | Western blot       | 1:1000          | GeneTex       | GTX103071          |

| <b>Target</b>    | <b>KD</b>      | <b>Raised In</b> | <b>Application</b>         | <b>Dilution</b>        | <b>Source</b>        | <b>Catalog No.</b> |
|------------------|----------------|------------------|----------------------------|------------------------|----------------------|--------------------|
| NSDHL            | 42             | Rabbit           | Western blot               | 1:1000                 | GeneTex              | GTX115995          |
| BTF3             | 22             | Rabbit           | Western blot               | 1:500                  | GeneTex              | GTX101462          |
| RAD23B           | 43             | Rabbit           | Western blot               | 1:1000                 | GeneTex              | GTX103424          |
| CPNE1            | 59             | Rabbit           | Western blot               | 1:1000                 | GeneTex              | GTX101441          |
| AP1G1            | 91             | Rabbit           | Western blot               | 1:1000                 | GeneTex              | ZF127128           |
| H3ac             | 16             | Rabbit           | ChIP                       | 1:50                   | Millipore            | 06-599             |
| HDAC3            | 49             | Rabbit           | ChIP                       | 1:50                   | Cell signaling       | Sc-11417           |
| $\beta$ -actin   | 42             | Mouse            | Western blot               | 1:5000                 | Novus<br>Biologicals | NB 600-501         |
| HA-tag (ZNF322A) | - <sup>a</sup> | Rabbit           | ChIP<br>IP<br>Western blot | 1:50<br>1:50<br>1:1000 | GeneTex              | GTX29110           |

<sup>a</sup> -, Molecular weight is not applicable.

**Table S5. The plasmids and their characteristics used in the current study.**

| Plasmid                      | Target                                         | Insert (bp)    | Function                | Source                         |
|------------------------------|------------------------------------------------|----------------|-------------------------|--------------------------------|
| pCMV-HA                      | None                                           | — <sup>a</sup> | Vector control          | Homemade                       |
| HA-ZNF322A                   | Wild type ZNF322A                              | 1083           | Overexpression          | Homemade                       |
| Flag                         | None                                           | — <sup>a</sup> | Vector control          | From Dr. B-K Chen <sup>b</sup> |
| c-Jun-Flag                   | Wild type c-Jun                                | 1212           | Overexpression          | From Dr. B-K Chen <sup>b</sup> |
| pCMV-3Tag-3A                 | None                                           | — <sup>a</sup> | Vector control          | From Dr. H-C Chen <sup>c</sup> |
| ADD1                         | Wild type ADD1                                 | 2214           | Overexpression          | From Dr. H-C Chen <sup>c</sup> |
| HA6L                         | None                                           | — <sup>a</sup> | Vector control          | From Dr. M-D Lai <sup>d</sup>  |
| CCND1                        | Wild type CCND1                                | 888            | Overexpression          | From Dr. M-D Lai <sup>d</sup>  |
| pcDNA3.1 V5-His              | None                                           | — <sup>a</sup> | Vector control          | From Dr. P-C Yang <sup>e</sup> |
| p53                          | Wild type p53                                  | 1182           | Overexpression          | From Dr. P-C Yang <sup>e</sup> |
| pGL3-vector                  | None                                           | — <sup>a</sup> | Vector control          | Promega                        |
| pGL3- <i>ADD1</i>            | <i>CCND1</i> promoter                          | 1146           | Promoter activity assay | Homemade                       |
| pGL3- <i>ADD1</i> -AP1-1-mut | <i>CCND1</i> promoter with first AP-1 mutation | 1146           | Promoter activity assay | Homemade                       |

|                                 |                                                           |                |                         |                                |
|---------------------------------|-----------------------------------------------------------|----------------|-------------------------|--------------------------------|
| pGL3- <i>ADD1</i> -AP1-2-mut    | <i>CCND1</i> promoter with second AP-1 mutation           | 1146           | Promoter activity assay | Homemade                       |
| pGL3- <i>ADD1</i> -AP1-D-mut    | <i>CCND1</i> promoter with third and fourth AP-1 mutation | 1146           | Promoter activity assay | Homemade                       |
| pGL4-vector                     | None                                                      | — <sup>a</sup> | Vector control          | Promega                        |
| pGL4- <i>CCND1</i>              | <i>CCND1</i> promoter                                     | 1190           | Promoter activity assay | Homemade                       |
| pGL4- <i>CCND1</i> -AP1-1-mut   | <i>CCND1</i> promoter with proximal AP-1 mutation         | 1190           | Promoter activity assay | Homemade                       |
| pGL4- <i>CCND1</i> -AP1-2-mut   | <i>CCND1</i> promoter with distal AP-1 mutation           | 1190           | Promoter activity assay | Homemade                       |
| pGL4- <i>CCND1</i> -AP1-1/2-mut | <i>CCND1</i> promoter with both AP-1 mutation             | 1190           | Promoter activity assay | Homemade                       |
| pGL3- <i>p53</i>                | <i>p53</i> promoter                                       | 1121           | Promoter activity assay | From Dr. G-T Sheu <sup>f</sup> |
| pGL3- <i>p53</i> -AP1-mut       | <i>p53</i> promoter with AP-1 mutation                    | 1121           | Promoter activity assay | Homemade                       |

<sup>a</sup> —, Molecular weight is not applicable.

<sup>b</sup> Plasmid was kindly provided by Dr. Ben-Kuen Chen from Institute of Bioinformatics and Biosignal Transduction, College of Bioscience and Biotechnology, National Cheng Kung University, Tainan, Taiwan.

<sup>c</sup> Plasmid was kindly provided by Dr. Hong-Chen Chen from Department of Life Sciences, National Chung Hsing University, Taichung, Taiwan.

<sup>d</sup> Plasmid was kindly provided by Dr. Ming-Derg Lai from Department of Biochemistry and Molecular Biology, National Cheng Kung University, Tainan, Taiwan.

<sup>e</sup> Plasmid was kindly provided by Dr. Pan-Chyr Yang from National Taiwan University Hospital and College of Medicine, Taipei, Taiwan.

<sup>f</sup> Plasmid was kindly provided by Dr. Gwo-Tarng Sheu from Institute of Medical and Molecular Toxicology, Chung Shan Medical University, Taichung, Taiwan.
